# Supplementary material for: Improving the efficiency of Cr( vi ) reduction and adsorption by Fe 3 O 4 using ZSM-5 zeolite support prepared through various methods
Source: Royal Society of Chemistry journal article supplement (doi:10.1039/d4ra06845a), 2025-01-01
Supplement: d4ra06845a1.pdf [file d4ra06845a1.pdf]

## Supplementary materials

### S1 XPS analysis of all adsorbents before and after Cr<sup>6+</sup> adsorption

| Sample      | Fe <sub>2p</sub>  |           |                   | O <sub>1s</sub>         |                          |                      |
|-------------|-------------------|-----------|-------------------|-------------------------|--------------------------|----------------------|
|             | 2p <sub>3/2</sub> | satellite | 2p <sub>1/2</sub> | Fe-O <sub>lattice</sub> | Fe-OH <sub>lattice</sub> | Fe-OH <sub>ads</sub> |
| Fe_COP      | 712.3             | 720.1     | 725.9             | 530.8                   |                          | 532.7                |
| Fe_HYD      | 711.0             | 718.4     | 724.6             | 530.5                   |                          | 532.5                |
| Fe/Z_COP    | 711.2             | 718.7     | 724.5             | 530.7                   |                          | 532.9                |
| Fe/Z_HYD    | 711.3             | 718.9     | 724.9             | 530.8                   |                          | 533.2                |
| Cr@Fe_COP   | 710.3             | 717.6     | 725.9             | 529.6                   | 531.8                    | 534.0                |
| Cr@Fe_HYD   | 710.3             | 718.0     | 723.9             | 529.8                   | 531.6                    | 533.4                |
| Cr@Fe/Z_COP | 710.5             | 718.2     | 723.7             | 529.8                   | 531.3                    | 533.2                |
| Cr@Fe/Z_HYD | 711.9             | 721.3     | 725.4             | 529.4                   | 531.7                    | 534.1                |

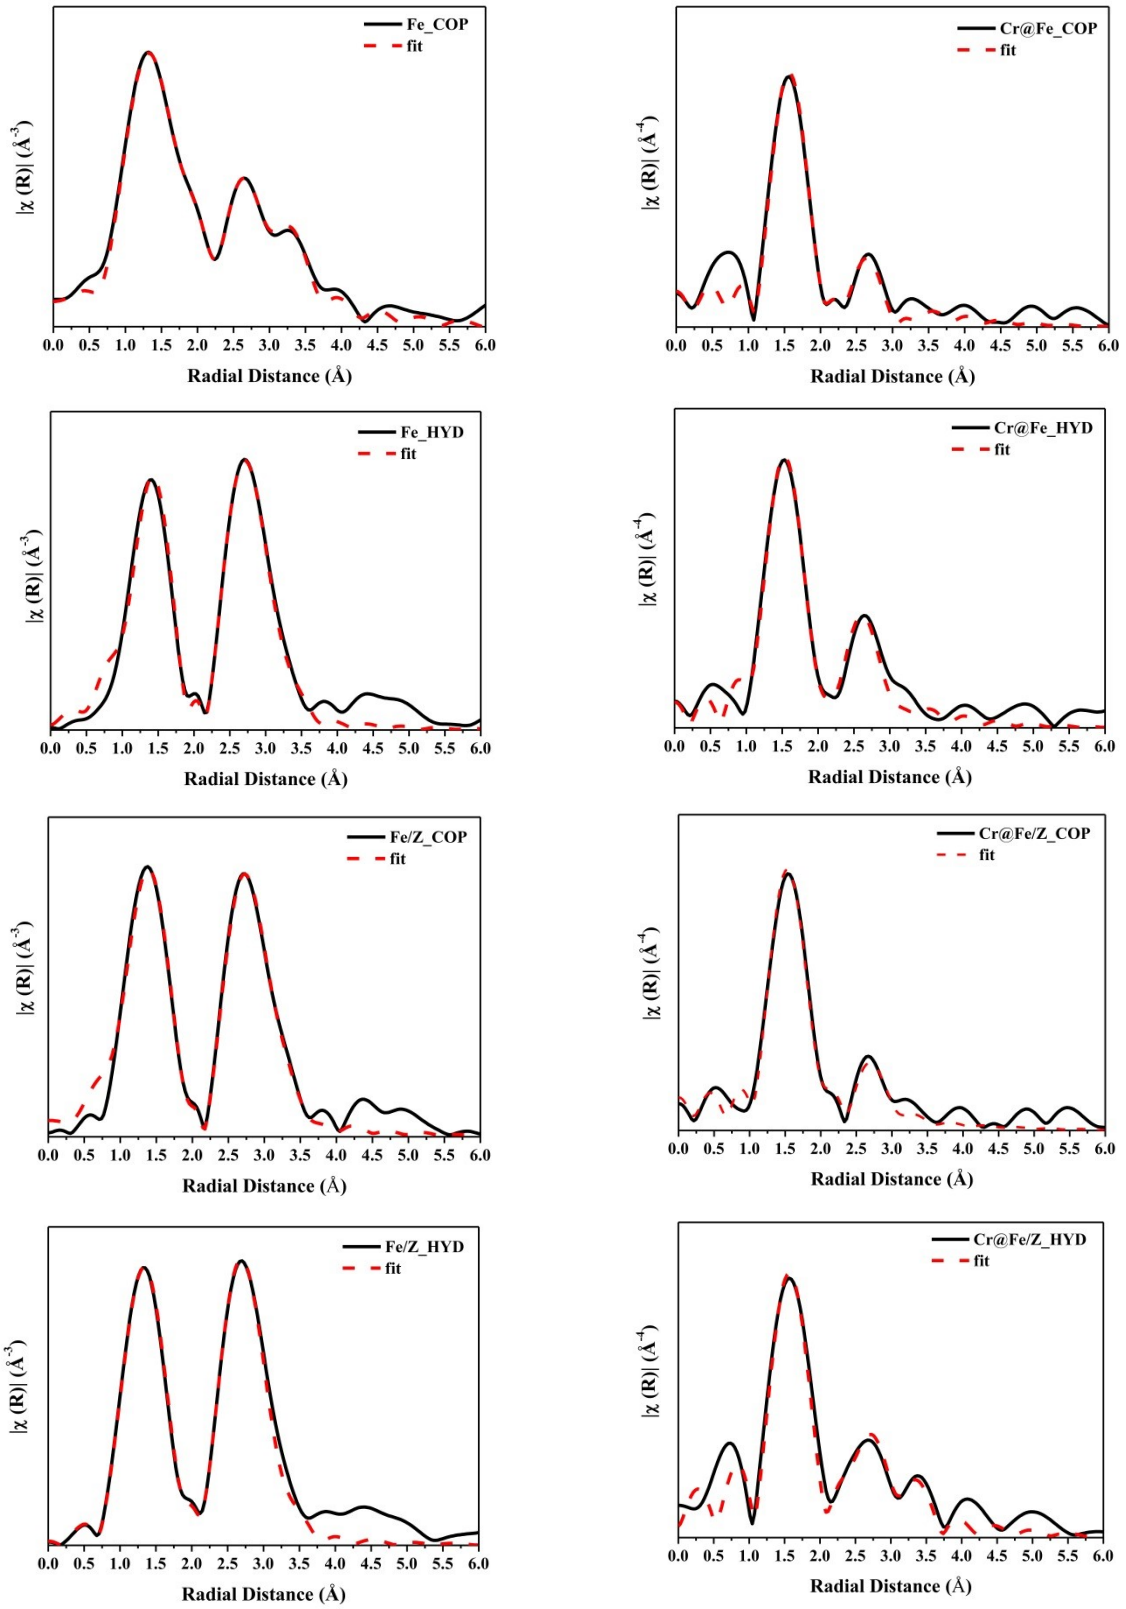

S2 Fe K-edge EXAFS spectra of (a) adsorbents before adsorbed Cr(VI) and (b) after adsorbed Cr(VI)

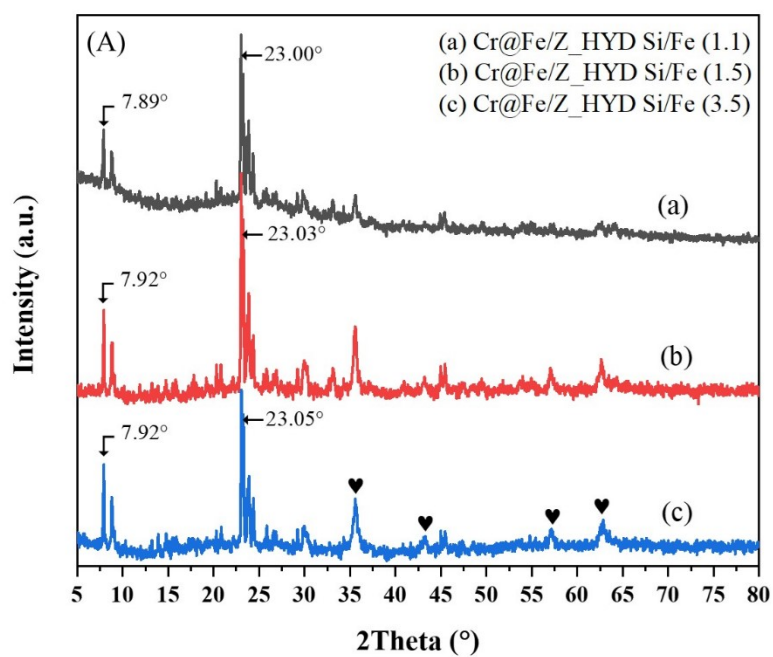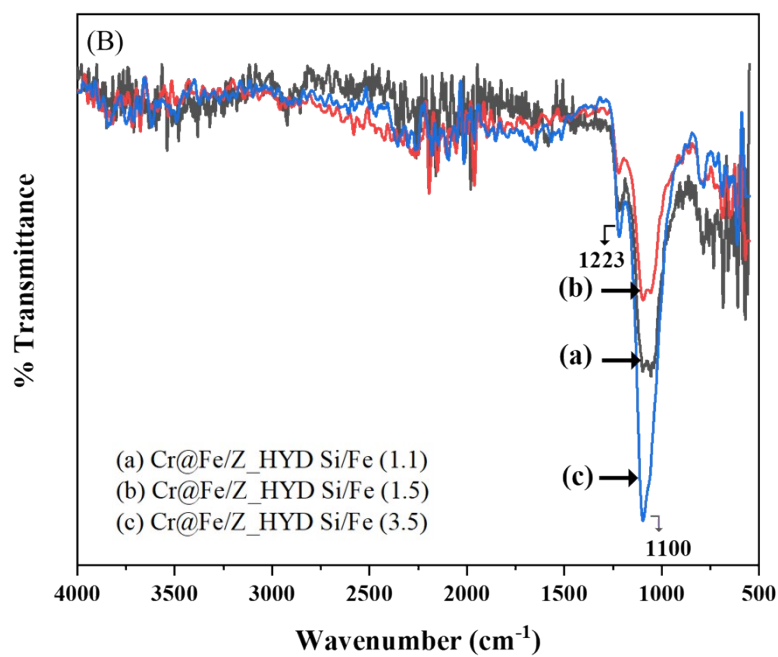

S3 XRD patterns (A) and FT-IR spectra (B) of the Cr@Fe/ZSM-5\_HYD with varying Fe loading

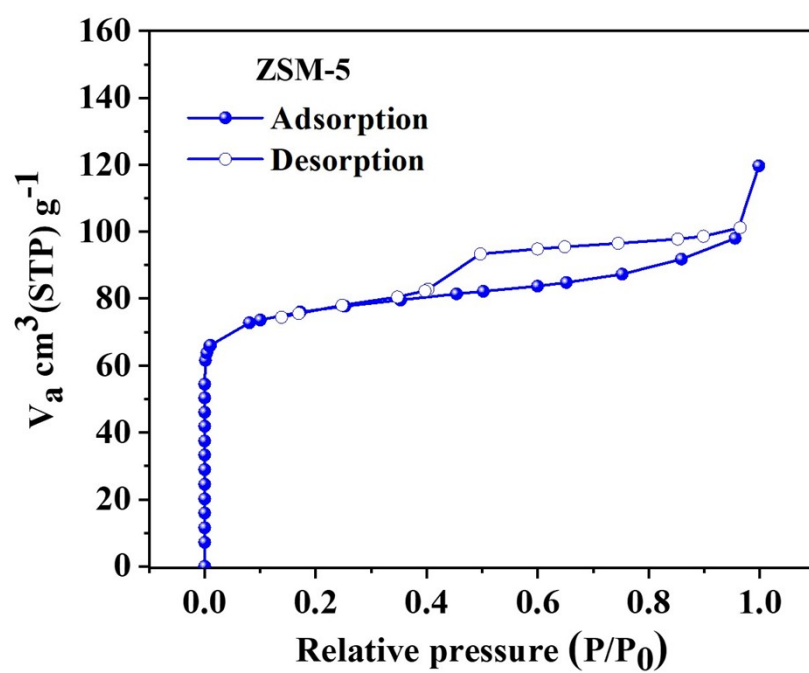

S4 N<sub>2</sub>-adsorption desorption of bare ZSM-5 without Fe addition
